# Supplementary material
Source: ML conference proceedings conference paper supplement (https://proceedings.neurips.cc/paper_files/paper/2019/hash/d2b15c75c0c389b49c2efbea79cdc946-Abstract.html)
Supplement: Supplementary file [file d2b15c75c0c389b49c2efbea79cdc946-Supplemental.zip]

## A Proof of Convergence for Divide-and-Conquer Algorithm

We claim the following:

- (a)  $A_+ \subset A_-$ .
- (b)  $v \in \mathbb{R}^d$  defined as  $v_{A_+} = \varepsilon$ ,  $v_{V \setminus A_-} = -\varepsilon$  and  $v_{A_+ \setminus A_-} = w_{A_+ \setminus A_-}$  is the unique global optimizer of Eq. (3).
- (c)  $t \in \mathbb{R}^d$  defined so that  $t_{A_+} = (s_+)_{A_+}$ ,  $t_{V \setminus A_-} = (s_-)_{V \setminus A_-}$  and  $t_{A_+ \setminus A_-} = s_{A_+ \setminus A_-}$ , is one of the maximizers of Eq. (9).

The statement (a) is a consequence of the usual results on minimizing  $f(w) + \frac{1}{2}\|w\|_2^2$  and its relationship with SFM. We are going to show (b) and (c) by showing that this is a primal/dual pair with equal objectives.

We need to show that  $t \in B(F)$ . We have for any  $A \subset V$ , using submodularity twice,

$$\begin{aligned}
 t(A) &= s_+(A \cap A_+) + t(A \cap (A_- \setminus A_+)) + s_-(A \cap (V \setminus A_-)) \\
 t(A) &\leq F(A \cap A_+) + F(A_+ \cup (A \cap (A_- \setminus A_+))) - F(A_+) + s_-(A \cap (V \setminus A_-)) \\
 &\leq F(A \cap A_-) + s_-(A \cup A_- \setminus A_-) \\
 &\leq F(A \cap A_-) + F(A \cup A_-) - s(A_-) \\
 &= F(A \cap A_-) + F(A \cup A_-) - F(A_-) \leq F(A).
 \end{aligned}$$

For  $A = V$ , all inequalities above are equalities, and thus  $t \in B(F)$ .

We need to show that  $w$  is feasible, i.e., that  $w_{A_+ \setminus A_-}$  has components in  $[-\varepsilon, \varepsilon]$ . This is a consequence of classical results for minimizing  $f(w) + \frac{1}{2}\|w\|_2^2$  [4, Prop. 8.1]

We can then compute the Lovász extension values exactly and we then have a primal value equal to:

$$\begin{aligned}
 &f(v) + \sum_{i=1}^n \psi(v_i) \\
 &= f(v) + \frac{1}{2}\|v\|^2 \\
 &= \varepsilon F(A_+) + f_{A_-}^{A_+}(w_{A_+ \setminus A_-}) + \varepsilon F(V) - \varepsilon F(A_-) + \frac{1}{2}\|w_{A_+ \setminus A_-}\|^2 + \frac{\varepsilon^2}{2}|A_+| + \frac{\varepsilon^2}{2}|V \setminus A_-|.
 \end{aligned}$$

The dual value is equal to

$$\begin{aligned}
 &-\sum_{i=1}^n \psi^*(-t_i) \\
 &= -\sum_{i \in A_+} \psi^*(-t_i) - \sum_{i \in A_- \setminus A_+} \psi^*(-t_i) - \sum_{i \in V \setminus A_-} \psi^*(-t_i) \\
 &= -\varepsilon \sum_{i \in A_+} (|(s_+)_i| - \frac{\varepsilon}{2}) + f_{A_-}^{A_+}(w_{A_+ \setminus A_-}) + \frac{1}{2}\|w_{A_+ \setminus A_-}\|^2 - \varepsilon \sum_{i \in V \setminus A_-} (|(s_-)_i| - \frac{\varepsilon}{2}) \\
 &= \varepsilon s_+(A_+) + \frac{\varepsilon^2}{2}|A_+| + f_{A_-}^{A_+}(w_{A_+ \setminus A_-}) + \frac{1}{2}\|w_{A_+ \setminus A_-}\|^2 + \varepsilon s_-(V \setminus A_-) + \frac{\varepsilon^2}{2}|V \setminus A_-|,
 \end{aligned}$$

which is thus equal to the primal value, hence optimality. Here we have used the fact that  $s_+(A_+) + s_-(V \setminus A_-) = F(V) + F(A_+) - F(A_-)$ . Indeed,  $s_+$  is the dual certificate for a SFM problem, and has to satisfy  $s_+(A_+) = F(A_+)$  [4, Prop. 10.3]. Similarly,  $s_-(A_-) = F(A_-)$ , which leads to  $s_+(A_+) + s_-(V \setminus A_-) = s_+(A_+) + s_-(V) - s_-(A_-) = F(A_+) + F(V) - F(A_-)$ .

Note that in the algorithm, there are some free choices for  $s_+$  and  $s_-$ , and that we can take all of them as subvector of the dual to the minimization of  $f(w) + \frac{\varepsilon}{2}\|w\|_2^2$ , but this is not the only choice.

## B Proof of Prop. 2

We follow the proof of [4, Prop. 10.5], which corresponds to the case  $\varepsilon = +\infty$ .

From a feasible primal candidate, we can always build a dual candidate  $s$  (e.g., by taking any dual maximizer). If we assume that for all  $\alpha \in [-c, c]$ , for  $c \in [0, \varepsilon]$  we have  $(F + \psi'(\alpha))(\{w \geq \alpha\}) - (s + \psi'(\alpha))_-(V) > \eta_C/(2c)$ , then we obtain that

$$\eta_C \geq \int_{-c}^c (F + \psi'(\alpha))(\{w \geq \alpha\}) - (s + \psi'(\alpha))_-(V) d\alpha > \eta_C,$$

which is a contradiction. Thus, we must at least one  $\alpha \in [-c, c]$  such that  $(F + \psi'(\alpha))(\{w \geq \alpha\}) - (s + \psi'(\alpha))_-(V) \leq \eta_C/(2c)$ . This implies that

$$F(\{w \geq \alpha\}) - s_-(V) \leq \eta_C/(2c) + cn.$$

This means that at least one level set of  $w$  has a certified gap less than

$$\begin{aligned} \eta_D &= \inf_{c \in [0, \varepsilon]} \eta_C/(2c) + cn \\ &= \inf_{c \in [0, 1]} \eta_C/(2\varepsilon c) + cn\varepsilon \\ &= (2n\varepsilon) \times \inf_{c \in [0, 1]} \frac{1}{2} \left( c + \frac{1}{c} \frac{\eta_C}{4n\varepsilon^2} \right) \\ &\leq (2n\varepsilon) \times \left( \sqrt{\frac{\eta_C}{4n\varepsilon^2}} + \frac{1}{2} \frac{\eta_C}{4n\varepsilon^2} \right) = \sqrt{\eta_C n/2} + \eta_C/(4\varepsilon) \end{aligned}$$

using the identity  $\inf_{c \in [0, 1]} \frac{1}{2} \left( c + \frac{a}{c} \right) \leq \sqrt{a} + a/2$ . If  $a \leq 1$ , take  $c = \sqrt{a}$  and the inf is less than  $\sqrt{a}$  and thus less than  $\sqrt{a} + a/2$ . If  $a > 1$ , take  $c = 1$  and the inf is less than  $1/2 + a/2$ , which is less than  $\sqrt{a} + a/2$  because  $1/2 < \sqrt{a}$
